# Supplementary material for: Genetic Evaluation in a Cohort of 126 Dutch Pulmonary Arterial Hypertension Patients
Source: PubMed Central journal article supplement (PMC7602048; doi:10.3390/genes11101191), 2020-10-13
Supplement: genes-11-01191-s001.pdf [file genes-11-01191-s001.pdf]

## **Supplementary material**

### **Supplementary Material S1**

#### *Detailed information on the genetic analysis methods*

Genes associated with PAH were analyzed by a WES-based virtual gene panel. Libraries were prepared with the Kapa HTP kit (Illumina), capture was performed with the SeqCap EZ MedExome kit (Roche NimbleGen). Sequencing was performed on an Illumina HiSeq4000 HTv4 with paired-end, 125 bp reads. The read alignment to GRCh37 (hg19) and variant calling were conducted with a pipeline based on the Burrows-Wheeler Aligner BWA-MEM 0.7 and the Genome Analysis Toolkit (GATK) 3.3.0. VCF files were filtered for variants in the genes of interest in Alissa (Agilent Technologies) and variant classification was performed using Alamut Visual according to ACGS/VKGL guidelines (1)

#### **References**

1. Wallis, Y.; Payne, S.; McAnulty, C.; Bodmer, D.; Sistermans, E.; Robertson, K.; Moore, D.; Abbs, S.; Deans, Z.; Devereau, A.; et al. Practice guidelines for the evaluation of pathogenicity and the reporting of sequence variants in clinical molecular genetics. Association for Clinical Genetic Science and the Dutch Society of Clinical Genetic Laboratory Specialists. 2013.

## Supplementary Material S2

Table S2. Overview of the detected class 3 variants in unrelated PAH patients.

| Gene          | Nucleotide Change | Amino Acid Change       | Pathogenicity        |
|---------------|-------------------|-------------------------|----------------------|
| <i>TBX4</i>   | c.167C>T          | p.(Ala56Val)            | Class 3              |
| <i>TBX4</i>   | c.1145A>C         | p.(Tyr382Ser)           | Class 3              |
| <i>NOTCH3</i> | c.5551C>T         | p.(Arg1851Cys)          | Class 3              |
| <i>NOTCH3</i> | c.1112del         | p.(Pro426Leu)           | Class 3              |
| <i>NOTCH3</i> | c.2803A>C         | p.(Asn935His)           | Class 3              |
| <i>NOTCH3</i> | c.2890G>C         | p.(Asp964His)           | Class 3              |
| <i>BMPR2</i>  | c.848_849insATA   | p.(Pro283_Asn284insTyr) | Class 3              |
| <i>BMPR2</i>  | c.1178A>G         | p.(Asn393Ser)           | Class 3 <sup>a</sup> |
| <i>BMPR2</i>  | c.2729G>A         | p.(Cys910Tyr)           | Class 3              |
| <i>FOXF1</i>  | c.427G>C          | p.(Gly143Arg)           | Class 3              |
| <i>FOXF1</i>  | c.613G>C          | p.(Gly205Arg)           | Class 3 <sup>a</sup> |
| <i>FOXF1</i>  | c.1021C>G         | p.(Arg341Gly)           | Class 3              |

Reference sequences: *TBX4* NM\_018488.2; *NOTCH3* NM\_000435.3; *BMPR2* NM\_001204.6; *FOXF1* NM\_001451.3

<sup>a</sup>These variants were found in one patient
